# Supplementary material
Source: HighWire-hosted journal article supplement (https://learnmem.cshlp.org/content/suppl/2023/04/12/30.4.74)
Supplement: Supplemental_Material.docx [file Supplemental_Material.docx]

# **Supplementary Data**

**Table S1.** D’Agostino & Pearson omnibus *K*2 normality test applied to the parameters of the acquisition session, according to Fig. 2A (see main text for details). Test statistic (*K*2) and *p-*value are indicated. Gray shading indicates a positive result for normality (p > 0.05). Fr., Freezing; Re., Rearing; Gr., Grooming; s, seconds; s/b, seconds per bout; b#, bout number.

|  | **ACQUISITION SESSION** | | | | | | | | | |
| --- | --- | --- | --- | --- | --- | --- | --- | --- | --- | --- |
|  |
|  | **Pre Fr. (s)** | **TS1 Fr. (s)** | **ITI Fr. (s)** | **TS2 Fr. (s)** | **Post Fr. (s)** | **Pre Fr. (b#)** | **TS1 Fr. (b#)** | **ITI Fr. (b#)** | **TS2 Fr. (b#)** | **Post Fr. (b#)** |
| ***K*2** | 52.59 | 57.95 | 15.15 | 10.92 | 3.38 | 37.92 | 12.14 | 8.11 | 5.20 | 10.70 |
| ***p*-value** | < 0.001 | < 0.001 | < 0.001 | 0.004 | 0.184 | < 0.001 | 0.002 | 0.017 | 0.074 | 0.005 |
|  | **Pre Fr. (s/b)** | **TS1 Fr. (s/b)** | **ITI Fr. (s/b)** | **TS2 Fr. (s/b)** | **Post Fr. (s/b)** | **Pre Re. (s)** | **TS1 Re. (s)** | **ITI Re. (s)** | **TS2 Re. (s)** | **Post Re. (s)** |
| ***K*2** | 11.19 | 57.95 | 33.02 | 17.86 | 2.31 | 1.25 | 1.65 | 4.32 | 7.51 | 27.14 |
| ***p*-value** | 0.004 | < 0.001 | < 0.001 | 0.001 | 0.315 | 0.536 | 0.438 | 0.115 | 0.023 | < 0.001 |
|  | **Pre Re. (b#)** | **TS1 Re. (b#)** | **ITI Re. (b#)** | **TS2 Re. (b#)** | **Post Re. (b#)** | **Pre Re. (s/b)** | **TS1 Re. (s/b)** | **ITI Re. (s/b)** | **TS2 Re. (s/b)** | **Post Re. (s/b)** |
| ***K*2** | 13.62 | 2.17 | 3.29 | 11.23 | 15.52 | 5.75 | 5.86 | 0.61 | 22.80 | 2.77 |
| ***p*-value** | 0.001 | 0.338 | 0.193 | 0.004 | < 0.001 | 0.056 | 0.054 | 0.736 | < 0.001 | 0.251 |
|  | **Pre Gr. (s)** | **TS1 Gr. (s)** | **ITI Gr. (s)** | **TS2 Gr. (s)** | **Post Gr. (s)** |  |  |  |  |  |
| ***K*2** | 1.15 | 57.68 | 33.91 | 54.35 | 57.95 |  |  |  |  |  |
| ***p*-value** | 0.562 | < 0.001 | < 0.001 | < 0.001 | < 0.001 |  |  |  |  |  |

**Table S2.** D’Agostino & Pearson *omnibus* *K*2 normality test applied to test session’s measured parameters, according to Fig. 2A (see main text for details). Test statistic (*K*2) and *p-*value are indicated. Gray shading indicates a positive result for normality (p > 0.05). Fr., Freezing; s, seconds; s/b, seconds per bout; b#, bout number.

|  | **TEST SESSION** | | | | | |
| --- | --- | --- | --- | --- | --- | --- |
|  |
|  | **Pre-CS Fr. (s)** | **CS Fr. (s)** | **Pre-CS Fr. (b#)** | **CS Fr. (b#)** | **Pre-CS Fr. (s/b)** | **CS Fr. (s/b)** |
| ***K*2** | 8.19 | 6.38 | 3.55 | 5.26 | 48.17 | 14.02 |
| ***p*-value** | 0.017 | 0.041 | 0.170 | 0.072 | < 0.001 | < 0.001 |

**Table S3.** Pearson correlation analysis for each acquisition and test parameter against ‘Pre-CS Freezing (s)’. Pearson statistic (*r*) and *p*-value are indicated. Gray shading indicates significant correlations (p < 0.05). Fr., Freezing; Re., Rearing; Gr., Grooming; s, seconds; s/b, seconds per bout; b#, bout number.

|  | **CORRELATION ANALYSIS AGAINST 'Pre-CS Freezing (s)'** | | | | | | | | | |
| --- | --- | --- | --- | --- | --- | --- | --- | --- | --- | --- |
|  |
|  | **Pre Fr. (s)** | **TS1 Fr. (s)** | **ITI Fr. (s)** | **TS2 Fr. (s)** | **Post Fr. (s)** | **Pre Fr. (b#)** | **TS1 Fr. (b#)** | **ITI Fr. (b#)** | **TS2 Fr. (b#)** | **Post Fr. (b#)** |
| *r* | 0,085 | -0,081 | 0,216 | 0,186 | 0,255 | 0,023 | 0,240 | 0,249 | 0,232 | 0,219 |
| *p*-value | 0,701 | 0,714 | 0,322 | 0,394 | 0,240 | 0,918 | 0,271 | 0,251 | 0,286 | 0,316 |
|  | **Pre Fr. (s/b)** | **TS1 Fr. (s/b)** | **ITI Fr. (s/b)** | **TS2 Fr. (s/b)** | **Post Fr. (s/b)** | **Pre Re. (s)** | **TS1 Re. (s)** | **ITI Re. (s)** | **TS2 Re. (s)** | **Post Re. (s)** |
| *r* | 0,127 | -0,081 | 0,210 | 0,244 | 0,050 | -0,075 | -0,144 | -0,403 | -0,103 | -0,201 |
| *p*-value | 0,564 | 0,714 | 0,337 | 0,262 | 0,821 | 0,734 | 0,511 | 0,056 | 0,639 | 0,357 |
|  | **Pre Re. (b#)** | **TS1 Re. (b#)** | **ITI Re. (b#)** | **TS2 Re. (b#)** | **Post Re. (b#)** | **Pre Re. (s/b)** | **TS1 Re. (s/b)** | **ITI Re. (s/b)** | **TS2 Re. (s/b)** | **Post Re. (s/b)** |
| *r* | 0,017 | 0,097 | -0,367 | -0,195 | -0,068 | -0,163 | -0,356 | -0,058 | 0,153 | -0,148 |
| *p*-value | 0,938 | 0,661 | 0,085 | 0,374 | 0,757 | 0,457 | 0,096 | 0,794 | 0,486 | 0,499 |
|  | **Pre Gr. (s)** | **TS1 Gr. (s)** | **ITI Gr. (s)** | **TS2 Gr. (s)** | **Post Gr. (s)** | **CS Fr. (s)** | **Pre-CS Fr. (b#)** | **CS Fr. (b#)** | **Pre-CS Fr. (s/b)** | **CS Fr. (s/b)** |
| *r* | 0,207 | -0,174 | -0,009 | -0,232 | -0,081 | 0,395 | 0,156 | -0,572 | 0,769 | 0,797 |
| *p*-value | 0,342 | 0,428 | 0,966 | 0,287 | 0,714 | 0,062 | 0,476 | 0,004 | 0,000 | 0,000 |

**Table S4.** Pearson correlation analysis for each acquisition and test parameter against ‘Pre-CS Freezing (b#)’. Pearson statistic (*r*) and *p*-value are indicated. Gray shading indicates significant correlations (p < 0.05).

|  | **CORRELATION ANALYSIS AGAINST 'Pre-CS Freezing (b#)'** | | | | | | | | | |
| --- | --- | --- | --- | --- | --- | --- | --- | --- | --- | --- |
|  |
|  | **Pre Fr. (s)** | **TS1 Fr. (s)** | **ITI Fr. (s)** | **TS2 Fr. (s)** | **Post Fr. (s)** | **Pre Fr. (b#)** | **TS1 Fr. (b#)** | **ITI Fr. (b#)** | **TS2 Fr. (b#)** | **Post Fr. (b#)** |
| *r* | 0,159 | 0,292 | 0,398 | 0,348 | 0,240 | -0,021 | 0,257 | 0,237 | 0,262 | 0,175 |
| *p*-value | 0,468 | 0,177 | 0,060 | 0,104 | 0,269 | 0,924 | 0,237 | 0,276 | 0,228 | 0,426 |
|  | **Pre Fr. (s/b)** | **TS1 Fr. (s/b)** | **ITI Fr. (s/b)** | **TS2 Fr. (s/b)** | **Post Fr. (s/b)** | **Pre Re. (s)** | **TS1 Re. (s)** | **ITI Re. (s)** | **TS2 Re. (s)** | **Post Re. (s)** |
| *r* | 0,382 | 0,292 | 0,416 | 0,420 | 0,240 | -0,426 | 0,127 | -0,163 | -0,258 | -0,358 |
| *p*-value | 0,072 | 0,177 | 0,048 | 0,046 | 0,271 | 0,043 | 0,563 | 0,459 | 0,234 | 0,094 |
|  | **Pre Re. (b#)** | **TS1 Re. (b#)** | **ITI Re. (b#)** | **TS2 Re. (b#)** | **Post Re. (b#)** | **Pre Re. (s/b)** | **TS1 Re. (s/b)** | **ITI Re. (s/b)** | **TS2 Re. (s/b)** | **Post Re. (s/b)** |
| *r* | -0,079 | 0,130 | -0,138 | 0,102 | -0,091 | -0,394 | -0,007 | -0,347 | -0,361 | -0,470 |
| *p*-value | 0,719 | 0,553 | 0,531 | 0,643 | 0,681 | 0,063 | 0,973 | 0,105 | 0,090 | 0,024 |
|  | **Pre Gr. (s)** | **TS1 Gr. (s)** | **ITI Gr. (s)** | **TS2 Gr. (s)** | **Post Gr. (s)** | **Pre-CS Fr. (s)** | **CS Fr. (s)** | **CS Fr. (b#)** | **Pre-CS Fr. (s/b)** | **CS Fr. (s/b)** |
| *r* | 0,406 | -0,242 | 0,354 | -0,197 | 0,292 | 0,156 | 0,324 | -0,221 | -0,238 | 0,156 |
| *p*-value | 0,055 | 0,266 | 0,097 | 0,367 | 0,177 | 0,476 | 0,132 | 0,311 | 0,274 | 0,477 |

**Table S5.** Pearson correlation analysis for each acquisition and test parameter against ‘Pre-CS Freezing (s/b)’. Pearson statistic (*r*) and *p*-value are indicated. Gray shading indicates significant correlations (p < 0.05).

|  | **CORRELATION ANALYSIS AGAINST 'Pre-CS Freezing (s/b)'** | | | | | | | | | |
| --- | --- | --- | --- | --- | --- | --- | --- | --- | --- | --- |
|  |
|  | **Pre Fr. (s)** | **TS1 Fr. (s)** | **ITI Fr. (s)** | **TS2 Fr. (s)** | **Post Fr. (s)** | **Pre Fr. (b#)** | **TS1 Fr. (b#)** | **ITI Fr. (b#)** | **TS2 Fr. (b#)** | **Post Fr. (b#)** |
| *r* | -0,048 | -0,075 | -0,081 | -0,055 | 0,186 | -0,078 | 0,074 | 0,117 | 0,108 | 0,165 |
| *p*-value | 0,828 | 0,734 | 0,715 | 0,802 | 0,395 | 0,723 | 0,736 | 0,595 | 0,624 | 0,452 |
|  | **Pre Fr. (s/b)** | **TS1 Fr. (s/b)** | **ITI Fr. (s/b)** | **TS2 Fr. (s/b)** | **Post Fr. (s/b)** | **Pre Re. (s)** | **TS1 Re. (s)** | **ITI Re. (s)** | **TS2 Re. (s)** | **Post Re. (s)** |
| *r* | -0,095 | -0,075 | -0,073 | -0,018 | 0,046 | 0,173 | -0,160 | -0,234 | -0,073 | -0,035 |
| *p*-value | 0,668 | 0,734 | 0,740 | 0,934 | 0,837 | 0,430 | 0,466 | 0,283 | 0,740 | 0,873 |
|  | **Pre Re. (b#)** | **TS1 Re. (b#)** | **ITI Re. (b#)** | **TS2 Re. (b#)** | **Post Re. (b#)** | **Pre Re. (s/b)** | **TS1 Re. (s/b)** | **ITI Re. (s/b)** | **TS2 Re. (s/b)** | **Post Re. (s/b)** |
| *r* | 0,165 | 0,059 | -0,257 | -0,155 | 0,019 | -0,023 | -0,258 | 0,278 | 0,084 | 0,117 |
| *p*-value | 0,452 | 0,791 | 0,236 | 0,481 | 0,930 | 0,917 | 0,235 | 0,199 | 0,703 | 0,595 |
|  | **Pre Gr. (s)** | **TS1 Gr. (s)** | **ITI Gr. (s)** | **TS2 Gr. (s)** | **Post Gr. (s)** | **Pre-CS Fr. (s)** | **CS Fr. (s)** | **Pre-CS Fr. (b#)** | **CS Fr. (b#)** | **CS Fr. (s/b)** |
| *r* | -0,053 | -0,084 | -0,091 | -0,120 | -0,075 | 0,769 | 0,316 | -0,238 | -0,372 | 0,710 |
| *p*-value | 0,810 | 0,702 | 0,679 | 0,584 | 0,734 | 0,000 | 0,142 | 0,274 | 0,081 | 0,000 |

**Table S6.** Spearman correlation analysis for each acquisition and test parameter against ‘Pre-CS Freezing (s)’. Spearman statistic (*r*s) and *p*-value are indicated. Gray shading indicates significant correlations (p < 0.05).

|  | **CORRELATION ANALYSIS AGAINST 'Pre-CS Freezing (s)'** | | | | | | | | | |
| --- | --- | --- | --- | --- | --- | --- | --- | --- | --- | --- |
|  |
|  | **Pre Fr. (s)** | **TS1 Fr. (s)** | **ITI Fr. (s)** | **TS2 Fr. (s)** | **Post Fr. (s)** | **Pre Fr. (b#)** | **TS1 Fr. (b#)** | **ITI Fr. (b#)** | **TS2 Fr. (b#)** | **Post Fr. (b#)** |
| *r*s | 0,091 | -0,032 | 0,370 | 0,429 | 0,310 | -0,115 | 0,383 | 0,407 | 0,407 | 0,419 |
| *p*-value | 0,678 | 0,884 | 0,082 | 0,041 | 0,149 | 0,602 | 0,072 | 0,054 | 0,054 | 0,046 |
|  | **Pre Fr. (s/b)** | **TS1 Fr. (s/b)** | **ITI Fr. (s/b)** | **TS2 Fr. (s/b)** | **Post Fr. (s/b)** | **Pre Re. (s)** | **TS1 Re. (s)** | **ITI Re. (s)** | **TS2 Re. (s)** | **Post Re. (s)** |
| *r*s | 0,105 | -0,032 | 0,310 | 0,394 | 0,213 | -0,140 | 0,016 | -0,460 | -0,148 | -0,193 |
| *p*-value | 0,633 | 0,884 | 0,150 | 0,063 | 0,330 | 0,524 | 0,941 | 0,027 | 0,500 | 0,377 |
|  | **Pre Re. (b#)** | **TS1 Re. (b#)** | **ITI Re. (b#)** | **TS2 Re. (b#)** | **Post Re. (b#)** | **Pre Re. (s/b)** | **TS1 Re. (s/b)** | **ITI Re. (s/b)** | **TS2 Re. (s/b)** | **Post Re. (s/b)** |
| *r*s | 0,102 | 0,198 | -0,427 | -0,141 | -0,140 | -0,271 | -0,120 | -0,266 | -0,154 | -0,282 |
| *p*-value | 0,642 | 0,366 | 0,042 | 0,522 | 0,525 | 0,210 | 0,587 | 0,220 | 0,484 | 0,192 |
|  | **Pre Gr. (s)** | **TS1 Gr. (s)** | **ITI Gr. (s)** | **TS2 Gr. (s)** | **Post Gr. (s)** | **CS Fr. (s)** | **Pre-CS Fr. (b#)** | **CS Fr. (b#)** | **Pre-CS Fr. (s/b)** | **CS Fr. (s/b)** |
| *r*s | 0,374 | -0,103 | 0,128 | -,469* | -0,032 | 0,356 | 0,509 | -0,607 | 0,930 | 0,660 |
| *p*-value | 0,078 | 0,640 | 0,561 | 0,024 | 0,884 | 0,095 | 0,013 | 0,002 | 0,000 | 0,001 |

**Table S7.** Spearman correlation analysis for each acquisition and test parameter against ‘Pre-CS Freezing (b#)’. Spearman statistic (*r*s) and *p*-value are indicated. Gray shading indicates significant correlations (p < 0.05).

|  | **CORRELATION ANALYSIS AGAINST 'Pre-CS Freezing (b#)'** | | | | | | | | | |
| --- | --- | --- | --- | --- | --- | --- | --- | --- | --- | --- |
|  |
|  | **Pre Fr. (s)** | **TS1 Fr. (s)** | **ITI Fr. (s)** | **TS2 Fr. (s)** | **Post Fr. (s)** | **Pre Fr. (b#)** | **TS1 Fr. (b#)** | **ITI Fr. (b#)** | **TS2 Fr. (b#)** | **Post Fr. (b#)** |
| *r*s | 0,241 | 0,306 | 0,398 | 0,332 | 0,257 | -0,105 | 0,305 | 0,322 | 0,343 | 0,292 |
| *p*-value | 0,269 | 0,156 | 0,060 | 0,122 | 0,237 | 0,633 | 0,157 | 0,134 | 0,109 | 0,176 |
|  | **Pre Fr. (s/b)** | **TS1 Fr. (s/b)** | **ITI Fr. (s/b)** | **TS2 Fr. (s/b)** | **Post Fr. (s/b)** | **Pre Re. (s)** | **TS1 Re. (s)** | **ITI Re. (s)** | **TS2 Re. (s)** | **Post Re. (s)** |
| *r*s | 0,267 | 0,306 | 0,353 | 0,370 | 0,263 | -0,416 | 0,077 | -0,252 | -0,174 | -0,259 |
| *p*-value | 0,218 | 0,156 | 0,099 | 0,082 | 0,225 | 0,048 | 0,728 | 0,245 | 0,426 | 0,232 |
|  | **Pre Re. (b#)** | **TS1 Re. (b#)** | **ITI Re. (b#)** | **TS2 Re. (b#)** | **Post Re. (b#)** | **Pre Re. (s/b)** | **TS1 Re. (s/b)** | **ITI Re. (s/b)** | **TS2 Re. (s/b)** | **Post Re. (s/b)** |
| *r*s | -0,153 | 0,070 | -0,207 | -0,019 | -0,174 | -0,354 | 0,090 | -0,292 | -0,236 | -0,406 |
| *p*-value | 0,487 | 0,750 | 0,343 | 0,931 | 0,428 | 0,098 | 0,684 | 0,176 | 0,279 | 0,055 |
|  | **Pre Gr. (s)** | **TS1 Gr. (s)** | **ITI Gr. (s)** | **TS2 Gr. (s)** | **Post Gr. (s)** | **Pre-CS Fr. (s)** | **CS Fr. (s)** | **CS Fr. (b#)** | **Pre-CS Fr. (s/b)** | **CS Fr. (s/b)** |
| *r*s | 0,328 | 0,017 | 0,360 | -0,183 | 0,306 | 0,509 | 0,337 | -0,184 | 0,305 | 0,329 |
| *p*-value | 0,126 | 0,938 | 0,091 | 0,404 | 0,156 | 0,013 | 0,116 | 0,399 | 0,158 | 0,125 |

**Table S8.** Spearman correlation analysis for each acquisition and test parameter against ‘Pre-CS Freezing (s/b)’. Spearman statistic (*r*s) and *p*-value are indicated. Gray shading indicates significant correlations (p < 0.05).

|  | **CORRELATION ANALYSIS AGAINST 'Pre-CS Freezing (s/b)'** | | | | | | | | | |
| --- | --- | --- | --- | --- | --- | --- | --- | --- | --- | --- |
|  |
|  | **Pre Fr. (s)** | **TS1 Fr. (s)** | **ITI Fr. (s)** | **TS2 Fr. (s)** | **Post Fr. (s)** | **Pre Fr. (b#)** | **TS1 Fr. (b#)** | **ITI Fr. (b#)** | **TS2 Fr. (b#)** | **Post Fr. (b#)** |
| *r*s | 0,082 | -0,064 | 0,329 | 0,368 | 0,228 | -0,119 | 0,383 | 0,348 | 0,322 | 0,315 |
| *p*-value | 0,709 | 0,771 | 0,125 | 0,084 | 0,296 | 0,588 | 0,072 | 0,104 | 0,135 | 0,143 |
|  | **Pre Fr. (s/b)** | **TS1 Fr. (s/b)** | **ITI Fr. (s/b)** | **TS2 Fr. (s/b)** | **Post Fr. (s/b)** | **Pre Re. (s)** | **TS1 Re. (s)** | **ITI Re. (s)** | **TS2 Re. (s)** | **Post Re. (s)** |
| *r*s | 0,093 | -0,064 | 0,285 | 0,313 | 0,145 | -0,030 | 0,043 | -0,466 | -0,074 | -0,260 |
| *p*-value | 0,675 | 0,771 | 0,187 | 0,146 | 0,509 | 0,891 | 0,846 | 0,025 | 0,738 | 0,230 |
|  | **Pre Re. (b#)** | **TS1 Re. (b#)** | **ITI Re. (b#)** | **TS2 Re. (b#)** | **Post Re. (b#)** | **Pre Re. (s/b)** | **TS1 Re. (s/b)** | **ITI Re. (s/b)** | **TS2 Re. (s/b)** | **Post Re. (s/b)** |
| *r*s | 0,085 | 0,290 | -0,399 | -0,126 | -0,196 | -0,178 | -0,126 | -0,308 | -0,076 | -0,313 |
| *p*-value | 0,700 | 0,180 | 0,059 | 0,568 | 0,370 | 0,415 | 0,568 | 0,153 | 0,732 | 0,146 |
|  | **Pre Gr. (s)** | **TS1 Gr. (s)** | **ITI Gr. (s)** | **TS2 Gr. (s)** | **Post Gr. (s)** | **Pre-CS Fr. (s)** | **CS Fr. (s)** | **Pre-CS Fr. (b#)** | **CS Fr. (b#)** | **CS Fr. (s/b)** |
| *r*s | 0,291 | -0,119 | 0,011 | -0,535 | -0,064 | 0,930 | 0,331 | 0,305 | -0,485 | 0,572 |
| *p*-value | 0,178 | 0,588 | 0,960 | 0,009 | 0,771 | 0,000 | 0,123 | 0,158 | 0,019 | 0,004 |

**Table S9.** Proximity matrix for the hierarchical cluster of cases labeled by rat number. Analysis was run on IBM® SPSS® Statistics software with Squared Euclidean Distance as dissimilarity measure between rat variable matrices. Variables were freezing, rearing and grooming duration at all acquisition phases (Pre, TS1, ITI, TS2, Post) and freezing duration at both test phases (Pre-CS, CS) for each rat.

|  | **Squared Euclidean Distance** | | | | | | | | | | | | | | | | | | | | | | |
| --- | --- | --- | --- | --- | --- | --- | --- | --- | --- | --- | --- | --- | --- | --- | --- | --- | --- | --- | --- | --- | --- | --- | --- |
| **Case** | **1:1** | **2:2** | **3:3** | **4:4** | **5:5** | **6:6** | **7:7** | **8:8** | **9:9** | **10:10** | **11:11** | **12:12** | **13:13** | **14:14** | **15:15** | **16:16** | **17:17** | **18:18** | **19:19** | **20:20** | **21:21** | **22:22** | **23:23** |
| **1:1** | 0 | 1956 | 10806 | 1651 | 1241 | 3619 | 862 | 609 | 1039 | 8016 | 640 | 870 | 5657 | 1148 | 927 | 945 | 8854 | 4286 | 4595 | 1060 | 822 | 11484 | 1225 |
| **2:2** | 1956 | 0 | 8014 | 1351 | 1824 | 3013 | 1308 | 979 | 2157 | 5411 | 1178 | 1244 | 3172 | 1702 | 1249 | 1255 | 7190 | 3594 | 3443 | 1337 | 1300 | 8401 | 1722 |
| **3:3** | 10806 | 8014 | 0 | 9629 | 8360 | 12707 | 7178 | 8024 | 9436 | 2962 | 10029 | 10506 | 4884 | 11355 | 7163 | 11681 | 8842 | 2489 | 5817 | 8264 | 11459 | 1501 | 12163 |
| **4:4** | 1651 | 1351 | 9629 | 0 | 1805 | 2874 | 1420 | 1031 | 2276 | 5530 | 1589 | 1730 | 2908 | 1600 | 1495 | 571 | 6449 | 3346 | 4109 | 2026 | 2030 | 8061 | 2588 |
| **5:5** | 1241 | 1824 | 8360 | 1805 | 0 | 1548 | 251 | 872 | 276 | 4456 | 989 | 946 | 2689 | 1760 | 1051 | 1024 | 4319 | 3682 | 1410 | 1240 | 2042 | 9494 | 2381 |
| **6:6** | 3619 | 3013 | 12707 | 2874 | 1548 | 0 | 2383 | 2972 | 2337 | 5516 | 3135 | 3094 | 3295 | 3576 | 3795 | 1998 | 3229 | 7179 | 2652 | 4182 | 4073 | 12729 | 3964 |
| **7:7** | 862 | 1308 | 7178 | 1420 | 251 | 2383 | 0 | 310 | 379 | 4562 | 646 | 745 | 2745 | 1365 | 559 | 941 | 5504 | 2636 | 1890 | 909 | 1700 | 8150 | 1969 |
| **8:8** | 609 | 979 | 8024 | 1031 | 872 | 2972 | 310 | 0 | 1040 | 5573 | 374 | 879 | 3676 | 993 | 567 | 777 | 7231 | 2488 | 3184 | 1025 | 1107 | 8391 | 1249 |
| **9:9** | 1039 | 2157 | 9436 | 2276 | 276 | 2337 | 379 | 1040 | 0 | 6271 | 856 | 561 | 3757 | 1712 | 1067 | 1200 | 6198 | 4572 | 2317 | 1078 | 2006 | 11041 | 2319 |
| **10:10** | 8016 | 5411 | 2962 | 5530 | 4456 | 5516 | 4562 | 5573 | 6271 | 0 | 7408 | 7600 | 1535 | 8003 | 5484 | 6987 | 1995 | 2631 | 2302 | 6377 | 8467 | 2771 | 9131 |
| **11:11** | 640 | 1178 | 10029 | 1589 | 989 | 3135 | 646 | 374 | 856 | 7408 | 0 | 518 | 4709 | 804 | 784 | 808 | 8593 | 4014 | 3685 | 930 | 840 | 11068 | 979 |
| **12:12** | 870 | 1244 | 10506 | 1730 | 946 | 3094 | 745 | 879 | 561 | 7600 | 518 | 0 | 4643 | 941 | 812 | 737 | 8163 | 4904 | 3645 | 618 | 931 | 11558 | 1243 |
| **13:13** | 5657 | 3172 | 4884 | 2908 | 2689 | 3295 | 2745 | 3676 | 3757 | 1535 | 4709 | 4643 | 0 | 5335 | 3705 | 3834 | 2374 | 3245 | 1534 | 4500 | 6463 | 4543 | 7035 |
| **14:14** | 1148 | 1702 | 11355 | 1600 | 1760 | 3576 | 1365 | 993 | 1712 | 8003 | 804 | 941 | 5335 | 0 | 1543 | 909 | 8934 | 4801 | 4819 | 1580 | 1388 | 11524 | 1727 |
| **15:15** | 927 | 1249 | 7163 | 1495 | 1051 | 3795 | 559 | 567 | 1067 | 5484 | 784 | 812 | 3705 | 1543 | 0 | 1361 | 7377 | 2438 | 3046 | 738 | 1248 | 8096 | 1493 |
| **16:16** | 945 | 1255 | 11681 | 571 | 1024 | 1998 | 941 | 777 | 1200 | 6987 | 808 | 737 | 3834 | 909 | 1361 | 0 | 6788 | 4914 | 3708 | 1519 | 1343 | 11246 | 1709 |
| **17:17** | 8854 | 7190 | 8842 | 6449 | 4319 | 3229 | 5504 | 7231 | 6198 | 1995 | 8593 | 8163 | 2374 | 8934 | 7377 | 6788 | 0 | 7067 | 2231 | 8048 | 9863 | 8532 | 10338 |
| **18:18** | 4286 | 3594 | 2489 | 3346 | 3682 | 7179 | 2636 | 2488 | 4572 | 2631 | 4014 | 4904 | 3245 | 4801 | 2438 | 4914 | 7067 | 0 | 3909 | 3589 | 4903 | 2281 | 5291 |
| **19:19** | 4595 | 3443 | 5817 | 4109 | 1410 | 2652 | 1890 | 3184 | 2317 | 2302 | 3685 | 3645 | 1534 | 4819 | 3046 | 3708 | 2231 | 3909 | 0 | 3506 | 5404 | 7529 | 5757 |
| **20:20** | 1060 | 1337 | 8264 | 2026 | 1240 | 4182 | 909 | 1025 | 1078 | 6377 | 930 | 618 | 4500 | 1580 | 738 | 1519 | 8048 | 3589 | 3506 | 0 | 1003 | 9521 | 1762 |
| **21:21** | 822 | 1300 | 11459 | 2030 | 2042 | 4073 | 1700 | 1107 | 2006 | 8467 | 840 | 931 | 6463 | 1388 | 1248 | 1343 | 9863 | 4903 | 5404 | 1003 | 0 | 12046 | 504 |
| **22:22** | 11484 | 8401 | 1501 | 8061 | 9494 | 12729 | 8150 | 8391 | 11041 | 2771 | 11068 | 11558 | 4543 | 11524 | 8096 | 11246 | 8532 | 2281 | 7529 | 9521 | 12046 | 0 | 12704 |
| **23:23** | 1225 | 1722 | 12163 | 2588 | 2381 | 3964 | 1969 | 1249 | 2319 | 9131 | 979 | 1243 | 7035 | 1727 | 1493 | 1709 | 10338 | 5291 | 5757 | 1762 | 504 | 12704 | 0 |

**Table S10.** Agglomeration schedule for the hierarchical cluster of cases labeled by rat number, iterated using IBM® SPSS® Statistics software with Squared Euclidean Distance as dissimilarity measure between rat variable matrices.

| **Stage** | **Cluster Combined** | | **Coefficients** | **Stage Cluster First Appears** | | **Next Stage** |
| --- | --- | --- | --- | --- | --- | --- |
| **Cluster 1** | **Cluster 2** | **Cluster 1** | **Cluster 2** |
| 1 | 5 | 7 | 250,825 | 0 | 0 | 2 |
| 2 | 5 | 9 | 327,628 | 1 | 0 | 10 |
| 3 | 8 | 11 | 374,108 | 0 | 0 | 7 |
| 4 | 21 | 23 | 504,468 | 0 | 0 | 16 |
| 5 | 4 | 16 | 570,638 | 0 | 0 | 11 |
| 6 | 12 | 20 | 618,287 | 0 | 0 | 9 |
| 7 | 1 | 8 | 624,273 | 0 | 3 | 8 |
| 8 | 1 | 15 | 759,705 | 7 | 0 | 9 |
| 9 | 1 | 12 | 854,092 | 8 | 6 | 10 |
| 10 | 1 | 5 | 889,501 | 9 | 2 | 12 |
| 11 | 4 | 14 | 1254,434 | 5 | 0 | 12 |
| 12 | 1 | 4 | 1340,111 | 10 | 11 | 13 |
| 13 | 1 | 2 | 1461,867 | 12 | 0 | 16 |
| 14 | 3 | 22 | 1500,821 | 0 | 0 | 19 |
| 15 | 13 | 19 | 1533,634 | 0 | 0 | 17 |
| 16 | 1 | 21 | 1543,2 | 13 | 4 | 20 |
| 17 | 10 | 13 | 1918,619 | 0 | 15 | 18 |
| 18 | 10 | 17 | 2199,96 | 17 | 0 | 21 |
| 19 | 3 | 18 | 2384,819 | 14 | 0 | 21 |
| 20 | 1 | 6 | 3104,126 | 16 | 0 | 22 |
| 21 | 3 | 10 | 5227,677 | 19 | 18 | 22 |
| 22 | 1 | 3 | 6572,195 | 20 | 21 | 0 |

**Table S11.** Shapiro-Wilk normality test applied to Cluster 1 (C1, n = 16) of the parameters measured during the acquisition. Test statistic (*W*) and *p-*value are indicated. Gray shading indicates a positive result for normality (p > 0.05). Fr., Freezing; Re., Rearing; Gr., Grooming; s, seconds; s/b, seconds per bout; b#, bout number.

|  | **ACQUISITION SESSION (C1)** | | | | | | | | | |
| --- | --- | --- | --- | --- | --- | --- | --- | --- | --- | --- |
|  |
|  | **Pre Fr. (s)** | **TS1 Fr. (s)** | **ITI Fr. (s)** | **TS2 Fr. (s)** | **Post Fr. (s)** | **Pre Fr. (b#)** | **TS1 Fr. (b#)** | **ITI Fr. (b#)** | **TS2 Fr. (b#)** | **Post Fr. (b#)** |
| ***W*** | 0.561 | 0.273 | 0.643 | 0.549 | 0.810 | 0.697 | 0.729 | 0.798 | 0.819 | 0.704 |
| ***p*-value** | < 0.001 | < 0.001 | < 0.001 | < 0.001 | 0.004 | < 0.001 | < 0.001 | 0.003 | 0.005 | < 0.001 |
|  | **Pre Fr. (s/b)** | **TS1 Fr. (s/b)** | **ITI Fr. (s/b)** | **TS2 Fr. (s/b)** | **Post Fr. (s/b)** | **Pre Re. (s)** | **TS1 Re. (s)** | **ITI Re. (s)** | **TS2 Re. (s)** | **Post Re. (s)** |
| ***W*** | 0.573 | 0.273 | 0.796 | 0.637 | 0.910 | 0.974 | 0.949 | 0.935 | 0.727 | 0.704 |
| ***p*-value** | < 0.001 | < 0.001 | 0.002 | < 0.001 | 0.119 | 0.897 | 0.480 | 0.297 | < 0.001 | < 0.001 |
|  | **Pre Re. (b#)** | **TS1 Re. (b#)** | **ITI Re. (b#)** | **TS2 Re. (b#)** | **Post Re. (b#)** | **Pre Re. (s/b)** | **TS1 Re. (s/b)** | **ITI Re. (s/b)** | **TS2 Re. (s/b)** | **Post Re. (s/b)** |
| ***W*** | 0.837 | 0.916 | 0.961 | 0.724 | 0.779 | 0.903 | 0.855 | 0.974 | 0.682 | 0.843 |
| ***p*-value** | 0.009 | 0.145 | 0.679 | < 0.001 | 0.001 | 0.088 | 0.016 | 0.902 | < 0.001 | 0.011 |
|  | **Pre Gr. (s)** | **TS1 Gr. (s)** | **ITI Gr. (s)** | **TS2 Gr. (s)** | **Post Gr. (s)** |  |  |  |  |  |
| ***W*** | 0.898 | 0.295 | 0.487 | 0.404 | 0.273 |  |  |  |  |  |
| ***p*-value** | 0.074 | < 0.001 | < 0.001 | < 0.001 | < 0.001 |  |  |  |  |  |

**Table S12.** Shapiro-Wilk normality test applied to Cluster 1 (C1, n = 16) of the parameters measured during the test session. Test statistic (*W*) and *p-*value are indicated. Gray shading indicates a positive result for normality (p > 0.05). Fr., Freezing; s, seconds; s/b, seconds per bout; b#, bout number.

|  | **TEST SESSION (C1)** | | | | | |
| --- | --- | --- | --- | --- | --- | --- |
|  |
|  | **Pre-CS Fr. (s)** | **CS Fr. (s)** | **Pre-CS Fr. (b#)** | **CS Fr. (b#)** | **Pre-CS Fr. (s/b)** | **CS Fr. (s/b)** |
| ***W*** | 0.858 | 0.875 | 0.949 | 0.936 | 0.949 | 0.827 |
| ***p*-value** | 0.018 | 0.033 | 0.470 | 0.306 | 0.470 | 0.006 |

**Table S13.** Shapiro-Wilk normality test applied to Cluster 2 (C2, n = 7) of the parameters measured during the acquisition session. Test statistic (*W*) and *p-*value are indicated. Gray shading indicates a positive result for normality (p > 0.05). Fr., Freezing; Re., Rearing; Gr., Grooming; s, seconds; s/b, seconds per bout; b#, bout number. (a)All values were zero, impossible to calculate *W*.

|  | **ACQUISITION SESSION (C2)** | | | | | | | | | |
| --- | --- | --- | --- | --- | --- | --- | --- | --- | --- | --- |
|  |
|  | **Pre Fr. (s)** | **TS1 Fr. (s)** | **ITI Fr. (s)** | **TS2 Fr. (s)** | **Post Fr. (s)** | **Pre Fr. (b#)** | **TS1 Fr. (b#)** | **ITI Fr. (b#)** | **TS2 Fr. (b#)** | **Post Fr. (b#)** |
| ***W*** | 0.602 | (a) | 0.889 | 0.913 | 0.940 | 0.638 | 0.937 | 0.962 | 0.969 | 0.958 |
| ***p*-value** | < 0.001 | 0.268 | 0.417 | 0.636 | < 0.001 | 0.615 | 0.833 | 0.894 | 0.800 |
|  | **Pre Fr. (s/b)** | **TS1 Fr. (s/b)** | **ITI Fr. (s/b)** | **TS2 Fr. (s/b)** | **Post Fr. (s/b)** | **Pre Re. (s)** | **TS1 Re. (s)** | **ITI Re. (s)** | **TS2 Re. (s)** | **Post Re. (s)** |
| ***W*** | 0.751 | (a) | 0.793 | 0.848 | 0.956 | 0.926 | 0.961 | 0.841 | 0.453 | 0.853 |
| ***p*-value** | 0.013 | 0.035 | 0.118 | 0.784 | 0.518 | 0.825 | 0.102 | < 0.001 | 0.130 |
|  | **Pre Re. (b#)** | **TS1 Re. (b#)** | **ITI Re. (b#)** | **TS2 Re. (b#)** | **Post Re. (b#)** | **Pre Re. (s/b)** | **TS1 Re. (s/b)** | **ITI Re. (s/b)** | **TS2 Re. (s/b)** | **Post Re. (s/b)** |
| ***W*** | 0.955 | 0.969 | 0.915 | 0.453 | 0.859 | 0.929 | 0.962 | 0.894 | 0.453 | 0.832 |
| ***p*-value** | 0.771 | 0.889 | 0.432 | < 0.001 | 0.147 | 0.546 | 0.834 | 0.296 | < 0.001 | 0.084 |
|  | **Pre Gr. (s)** | **TS1 Gr. (s)** | **ITI Gr. (s)** | **TS2 Gr. (s)** | **Post Gr. (s)** |  |  |  |  |  |
| ***W*** | 0.908 | (a) | 0.453 | (a) | (a) |  |  |  |  |  |
| ***p*-value** | 0.380 | < 0.001 |  |  |  |  |  |

**Table S14.** Shapiro-Wilk normality test applied to Cluster 2 (C2, n = 7) of the parameters measured during the test session. Test statistic (*W*) and *p-*value are indicated. Gray shading indicates a positive result for normality (p > 0.05). Fr., Freezing; s, seconds; s/b, seconds per bout; b#, bout number.

|  | **TEST SESSION (C2)** | | | | | |
| --- | --- | --- | --- | --- | --- | --- |
|  |
|  | **Pre-CS Fr. (s)** | **CS Fr. (s)** | **Pre-CS Fr. (b#)** | **CS Fr. (b#)** | **Pre-CS Fr. (s/b)** | **CS Fr. (s/b)** |
| ***W*** | 0.903 | 0.907 | 0.943 | 0.833 | 0.657 | 0.840 |
| ***p*-value** | 0.349 | 0.376 | 0.670 | 0.086 | 0.001 | 0.099 |

**Table S15.** Two-sample hypothesis testing applied to Cluster 1 (C1) vs Cluster 2 (C2) parameters. A Shapiro-Wilk normality test summary is shown (see tables S11-14 for details; N, normally distributed). Student’s *t* test was applied when both C1 and C2 were normally distributed; otherwise, Mann-Whitney *U* test was chosen. Test statistic (*U* or *t*) and corresponding *p-*values are indicated. Gray shading indicates a significant difference was detected (p < 0.05). Fr., Freezing; Re., Rearing; Gr., Grooming; s, seconds; s/b, seconds per bout; b#, bout number. (a)*W* was not calculated.

| **Parameter** | **Shapiro-Wilk normality test** | | **Two-Sample Hypothesis Test** | **Statistic** | | **2-tailed**  ***p*-value** |
| --- | --- | --- | --- | --- | --- | --- |
| **C1** | **C2** | ***U*** | ***t*** |
| Pre Fr. (s) |  |  | Mann-Whitney | 40.0 |  | 0.189 |
| TS1 Fr. (s) |  | (a) | Mann-Whitney | 52.5 |  | 0.508 |
| ITI Fr. (s) |  | N | Mann-Whitney | 28.0 |  | 0.054 |
| TS2 Fr. (s) |  | N | Mann-Whitney | 23.0 |  | 0.019 |
| Post Fr. (s) |  | N | Mann-Whitney | 35.5 |  | 0.170 |
| Pre Fr. (b#) |  |  | Mann-Whitney | 45.0 |  | 0.409 |
| TS1 Fr. (b#) |  | N | Mann-Whitney | 28.0 |  | 0.059 |
| ITI Fr. (b#) |  | N | Mann-Whitney | 29.0 |  | 0.071 |
| TS2 Fr. (b#) |  | N | Mann-Whitney | 29.5 |  | 0.074 |
| Post Fr. (b#) |  | N | Mann-Whitney | 27.5 |  | 0.055 |
| Pre Fr. (s/b) |  |  | Mann-Whitney | 40.0 |  | 0.189 |
| TS1 Fr. (s/b) |  | (a) | Mann-Whitney | 52.5 |  | 0.508 |
| ITI Fr. (s/b) |  |  | Mann-Whitney | 31.0 |  | 0.085 |
| TS2 Fr. (s/b) |  | N | Mann-Whitney | 26.0 |  | 0.034 |
| Post Fr. (s/b) | N | N | t test |  | -0.318 | 0.756 |
| Pre Re. (s) | N | N | t test |  | 0.819 | 0.436 |
| TS1 Re. (s) | N | N | t test |  | 0.275 | 0.789 |
| ITI Re. (s) | N | N | t test |  | 3.664 | 0.002 |
| TS2 Re. (s) |  |  | Mann-Whitney | 44.0 |  | 0.325 |
| Post Re. (s) |  | N | Mann-Whitney | 50.5 |  | 0.701 |
| Pre Re. (b#) |  | N | Mann-Whitney | 44.0 |  | 0.418 |
| TS1 Re. (b#) | N | N | t test |  | -0.727 | 0.489 |
| ITI Re. (b#) | N | N | t test |  | 3.583 | 0.002 |
| TS2 Re. (b#) |  |  | Mann-Whitney | 40.0 |  | 0.189 |
| Post Re. (b#) |  | N | Mann-Whitney | 51.0 |  | 0.726 |
| Pre Re. (s/b) | N | N | t test |  | 0.462 | 0.652 |
| TS1 Re. (s/b) |  | N | Mann-Whitney | 37.0 |  | 0.204 |
| ITI Re. (s/b) | N | N | t test |  | 0.897 | 0.395 |
| TS2 Re. (s/b) |  |  | Mann-Whitney | 46.0 |  | 0.412 |
| Post Re. (s/b) |  | N | Mann-Whitney | 51.5 |  | 0.754 |
| Pre Gr. (s) | N | N | t test |  | -0.722 | 0.484 |
| TS1 Gr. (s) |  | (a) | Mann-Whitney | 49.0 |  | 0.339 |
| ITI Gr. (s) |  |  | Mann-Whitney | 50.0 |  | 0.579 |
| TS2 Gr. (s) |  | (a) | Mann-Whitney | 38.5 |  | 0.105 |
| Post Gr. (s) |  | (a) | Mann-Whitney | 52.5 |  | 0.508 |
| Pre-CS Fr. (s) |  | N | Mann-Whitney | 0.0 |  | < 0.001 |
| CS Fr. (s) |  | N | Mann-Whitney | 32.0 |  | 0.109 |
| Pre-CS Fr. (b#) | N | N | t test |  | -0.974 | 0.349 |
| CS Fr. (b#) | N | N | t test |  | 5.277 | < 0.001 |
| Pre-CS Fr. (s/b) | N |  | Mann-Whitney | 0.0 |  | < 0.001 |
| CS Fr. (s/b) |  | N | Mann-Whitney | 2.0 |  | < 0.001 |

**Figure S1.** Non-parametric correlation analysis between test Pre-CS freezing duration and training TS2 freezing duration **(A)**, Post freezing bout number **(B)**, ITI Rearing duration **(C)** and ITI Rearing bout number **(D)**, and between test Pre-CS duration per bout and training ITI Rearing duration **(E)** and TS2 Grooming duration **(F)** showed statistical significance (*p* < 0.05 in A-E, *p* < 0.01 in F; see Tables S6-8 and main text for details). As can be seen, however, these Spearman correlations are hard to ascribe to definite non-linear functions.
